1 **Basicity of N5 in semiquinone enhances the rate of respiratory electron outflow in**  
2 ***Shewanella oneidensis* MR-1**

3

4 Yoshihide Tokunou<sup>1,2</sup>, Keisuke Saito<sup>1,3</sup>, Ryo Hasegawa<sup>1</sup>, Kenneth H. Nealson<sup>4</sup>, Kazuhito  
5 Hashimoto<sup>2</sup>, Hiroshi Ishikita<sup>1,3</sup>, and Akihiro Okamoto<sup>2,5\*</sup>

6

7 \*To whom correspondence should be addressed.

8 E-mail: OKAMOTO.Akihiro@nims.go.jp

9 Tel: +81-29-860-4430

10

11 **Affiliations:**

12 1. Department of Applied Chemistry, The University of Tokyo, 7-3-1 Hongo, Bunkyo-ku,  
13 Tokyo 113-8656, Japan.

14 2. International Center for Materials Nanoarchitectonics, National Institute for Materials  
15 Science, 1-1 Namiki, Tsukuba, Ibaraki 305-0044, Japan.

16 3. Research Center for Advanced Science and Technology, The University of Tokyo, 4-6-1  
17 Komaba, Meguro-ku, Tokyo 153-8904, Japan.

18 4. Department of Earth Sciences, University of Southern California, Los Angeles, CA 90089,  
19 USA.

20 5. Center for Functional Sensor & Actuator, National Institute for Materials Science, 1-1  
21 Namiki, Tsukuba, Ibaraki 305-0044, Japan

22 **Abstract**

23 Extracellular electron transport (EET) occurs in environmental iron-reducing bacteria and is  
24 mediated by an outer membrane multi-heme cytochrome complex (Cyts). It has critical  
25 implications for global mineral cycling and electrochemical microbial catalysis. The rate of  
26 EET mediated by multiple heme redox centers significantly increases in the presence of  
27 flavins and quinones. Their electron free energy does not entirely account for the fact that  
28 differential effects on EET rate enhancement vary significantly by factors  $\geq 100$ . Here, we  
29 report on whole-cell electrochemical analysis of *Shewanella oneidensis* MR-1 using six flavin  
30 analogs and four quinones. We demonstrated that protonation of the nitrogen atom at position  
31 5 (N5) of the isoalloxazine ring is essential for electron outflow acceleration as a bound non-  
32 covalent cofactor of Cyts. EET mediated by Cyts was accelerated at a rate dependent on  
33  $pK_a(N5)$ . The EET rate largely decreased in response to the addition of deuterated water  
34 ( $D_2O$ ), while low concentration of  $D_2O$  (4 %) had little impact on electron free energy  
35 difference of the heme and non-covalent bound cofactors, strongly suggesting that the  
36 protonation of N5 limits the rate of EET. Our findings directly link EET kinetics to proton  
37 transport reaction via N5 and provide a basis for the development of novel strategies for  
38 controlling EET-associated biological reactions.

39

40 **Keywords:** Extracellular electron transport; Flavin; Kinetic isotope effect; Proton transfer;  
41 Whole-cell electrochemistry

42 **Significance statement**

43 The potential of various small molecules such as flavins and quinones to enhance the rate of  
44 extracellular electron transport (EET) has been exploited to develop environmental energy  
45 conversion systems. Flavins and quinones have similar molecular structures but their abilities  
46 to enhance EET vary by >100× in *Shewanella oneidensis* MR-1. These large differences are  
47 inconsistent with conventional models, which rely on redox potentials or diffusion constant of  
48 shuttling electron mediators. In this study, we demonstrated that the basicity of the nitrogen  
49 atom of the isoalloxazine ring (N5) enhances the rate of electron outflow when a flavin or  
50 quinone is a non-covalent cofactor of *S. oneidensis* MR-1 outer membrane *c*-type  
51 cytochromes.

52

## 53 Introduction

54 Extracellular electron transport (EET) is the process through which prokaryotes move  
55 electrons between the membrane interior and the cell exterior, such that redox reactions can  
56 occur with otherwise unavailable extracellular electron donors or acceptors (1-4). Microbes  
57 with the EET molecular machinery can render innovative metabolic processes inaccessible to  
58 microbes without the EET machinery. These include redox reactions with solid minerals (1,  
59 2), intercellular electron transfer (5, 6), and surface interactions with electrodes for  
60 application in energy production and environmental technologies (7-11). The role of redox  
61 molecules as enhancers of bacterial current production remains controversial. High exogenous  
62 quinone concentrations ( $\geq 10 \mu\text{M}$ ) enhance EET via an electron-shuttling mechanism, which is  
63 a two-electron redox process (12-14). In contrast, low levels of endogenous riboflavin or  
64 flavin mononucleotide (FMN) ( $\leq 1 \mu\text{M}$ ) accumulate in cultures of EET-capable bacteria, non-  
65 covalently bind specific sites of outer membrane *c*-type cytochromes (Cyts) as cofactors (15-  
66 18), and form singly reduced semiquinone (SQ). Upon one-electron reduction of flavin,  
67 protonation occurs at the N5 nitrogen with the  $pK_a$  value ( $pK_a(\text{N5})$ ) of 8.6 (19).

68 SQ enhances the EET rate to the same extent as exogenous quinone-mediated shuttling  
69 despite hundredfold lower endogenous concentrations (15, 18, 20-23). Nevertheless, electron  
70 transfer mediated by SQ are thermodynamically unfavorable. The redox potentials ( $E_0$ ) of the  
71 hemes in Cyts vary widely depending on the surrounding environment and are typically in the  
72 range of  $-400$  to  $+200$  mV relative to a standard hydrogen electrode (SHE) (24-32). SQ-  
73 mediated EET acceleration occurs when  $E_0$  for Cyts is  $>+50$  mV (vs. SHE) (15, 18, 20). SQ  
74 and oxidized flavin cycling have  $E_0$  of  $\sim -100$  mV (vs. SHE), which is  $>150$  mV lower than  
75 those of the Cyt heme groups (15, 18, 20). Therefore, thermodynamically unfavorable  
76 electron transfer from Cyts to SQ is unlikely to enhance the EET rate. Bound and free flavins  
77 are crucial in numerous anaerobic electron bifurcation reactions using them as SQ  
78 intermediates (33, 34). Flavins function as a major metabolic pathway in various  
79 Gram-positive bacteria such as the pathogen *Listeria monocytogenes* (35, 36) and in other  
80 metal reducing bacteria *Geobacter sulfurreducens* PCA (16).

81 The interactions of flavins with purified Cyts have been extensively investigated in the  
82 model EET-capable bacterium *Shewanella oneidensis* MR-1 (17, 37-40). On the other hand,  
83 stabilization of the SQ state in Cyts was confirmed only in intact cells (15, 20) possibly  
84 because of the structural complexity and dynamics of Cyt (41-44). Whole-cell approaches  
85 significantly limit access to molecular-level information about specific enzymes.  
86 Consequently, SQ-mediated EET rate enhancement mechanisms are unknown. Recently, a  
87 whole-cell electrochemical assay demonstrated that molecules analogous to riboflavin can

88 associate with Cyts in their single-electron reduced state (22). Thus, there is a potential  
89 control mechanism for the interaction between the Cyts binding site and the SQ cofactor.

90 In the present study, we analyzed the influence of (i) various flavin analogs and  
91 quinones on EET rate enhancement with respect to the  $pK_a$  of the flavin isoalloxazine ring;  
92 (ii) pH on the  $E_0$  for flavins and flavin analogs; and (iii) the kinetic isotope effect (KIE) on  
93 EET with heavy water using intact *S. oneidensis* MR-1 cells. These data indicate that the  
94 nitrogen atom at position-5 (N5) of the isoalloxazine ring determines the ability of the flavin  
95 analog to bind Cyts and forms a semi-reduced (SR) intermediate analogous to SQ before  
96 rapid and direct single-electron transfer. The protonation probability of N5 (i.e.,  $pK_a(N5)$ ) is  
97 most likely a key determinant of the kinetic properties of EET.

## 98 Results and discussion

99 To identify the key properties of the flavin analogs and quinones involved in EET  
100 kinetics, we measured the rate and amount of current produced by *S. oneidensis* MR-1 during  
101 lactate oxidation ( $i_c$ ) in the presence of riboflavin, flavin mononucleotide (FMN), six flavin  
102 analogs, and four quinones (Fig. 1A). We measured the formation of the semi-reduced (SR)  
103 state during  $i_c$  generation with each flavin and quinone using a three-electrode  
104 electrochemical system equipped with an indium tin-doped oxide (ITO) working electrode  
105 under +0.4 V (vs. SHE). Lactate (10 mM) served as the sole electron donor. Unless otherwise  
106 noted, the concentration of all flavin analogs and quinones tested was 2.0  $\mu\text{M}$ . At this  
107 concentration, riboflavin strongly enhances  $i_c$  in *S. oneidensis* MR-1 as a bound cofactor by  
108 forming the intermediate SR state (15, 20). Flavin analogs with N5 in their polycyclic  
109 backbones (Fig. 1A) enhanced  $i_c$  at a rate equal to, or higher than that measured with  
110 riboflavin (Figs. 1B and S1A). MB gave the highest enhancement among N5 molecules. The  
111 dramatic  $i_c$  enhancement induced by MB was impaired by >90% via the deletion of the genes  
112 corresponding to Cyts (Fig. S1E). Similar substantial current decreases were also observed  
113 with riboflavin and FMN (15, 20). These data suggest that the N5-containing molecules  
114 enhance the rate of EET through Cyts, and their interactions with outer-membrane make  
115 negligible contributions to  $i_c$  as observed in several redox molecules (45, 46).  
116

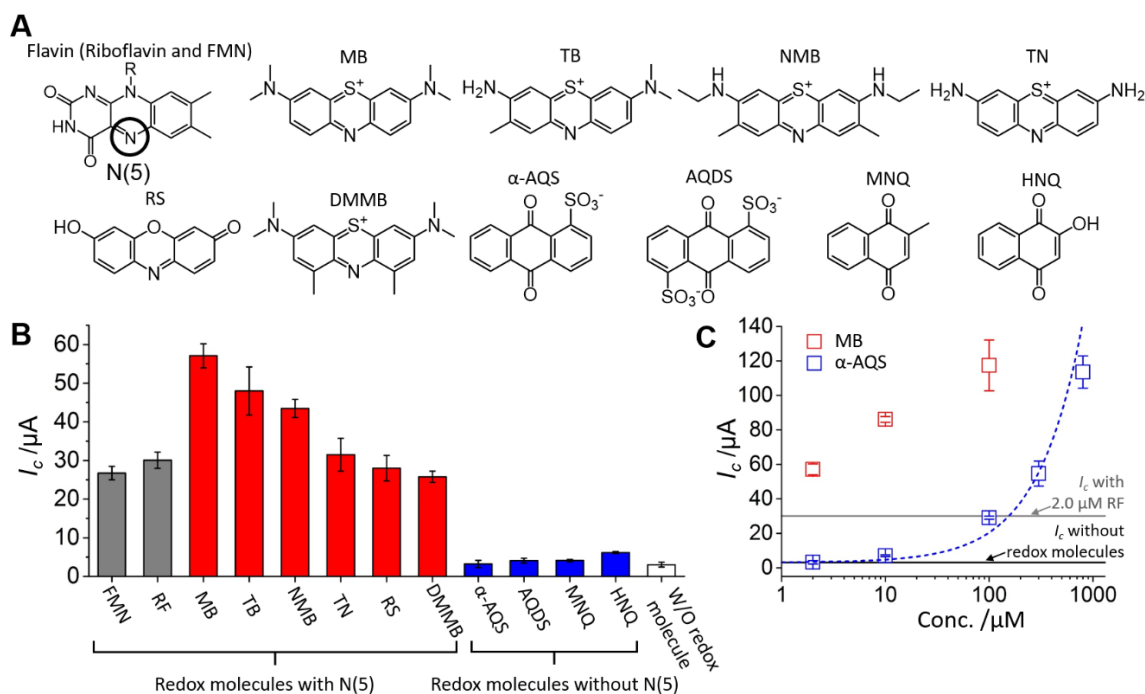

117

118 **Fig. 1.** (A) Chemical structures of the redox molecules used in the present study. N5 in the  
119 isoalloxazine ring is circled in the chemical structure of flavin. Methylene blue (MB),

120 toluidine blue (TB), new methylene blue (NMB), thionine (TN), resorufin (RS), and 1,9-  
121 dimethyl-methylene blue (DMMB) have N5, while anthraquinone-1-sulfonate ( $\alpha$ -AQS),  
122 anthraquinone-1,5-disulfonate (AQDS), 2-methyl-1,4-naphthoquinone (MNQ), and 2-  
123 hydroxy-1,4-naphthoquinone (HNQ) lack it. (B) Maximum catalytic current of microbial  
124 lactate oxidation in *S. oneidensis* MR-1 ( $I_c$ ) after 10 h measurement in the presence of each  
125 molecule shown in (A).  $I_c$  in the presence of flavin, flavin analogs, and quinones are  
126 represented as gray, red, and blue bars, respectively. Concentration of each redox molecule  
127 was set to 2.0  $\mu$ M. Error bars represent mean  $\pm$  SEM for  $\geq$ three individual experiments in  
128 separate reactors. (C)  $I_c$  vs. MB or  $\alpha$ -AQS concentration in the reactor. Blue dotted line  
129 represents  $I_c$  estimated by Fick's law according to the diffusion kinetics of  $\alpha$ -AQS between  
130 the cell and the electrode. Error bars represent the mean  $\pm$  SEM for  $\geq$ three individual  
131 experiments in separate reactors.

132

133 Comparatively less EET enhancement was observed in the presence of quinones lacking  
134 N5 (blue bars in Figs. 1B and S1B). We compared the concentration dependencies of MB  
135 (with N5) and  $\alpha$ -AQS (without N5) over 10 h using the max  $i_c$  value ( $I_c$ ).  $I_c$  increased with  $\alpha$ -  
136 AQS concentration in accordance with the  $\alpha$ -AQS diffusion kinetics estimated by Fick's law  
137 (Figs. 1C and S1C). A concentration of 100  $\mu$ M  $\alpha$ -AQS was required to reach the same level  
138 of  $i_c$  as that achieved using 2.0  $\mu$ M riboflavin, which is characteristic of diffusion-based  
139 shuttling mechanisms (Fig. 1C). The diffusion-limited kinetics of electron transfer from  $\alpha$ -  
140 AQS to the electrode was previously confirmed by voltammetric analysis at scan rates of 1–  
141 100 mVs<sup>-1</sup> in the presence of the *S. oneidensis* MR-1 biofilm (47). With an N5-containing  
142 molecule (N5 molecule), MB,  $I_c$  enhancement did not follow Fick's law and occurred at low  
143 concentrations (Fig. 1C and S1D). The observed scan rate dependency in cyclic voltammetry  
144 analysis indicated that the rate of electron transfer is not limited by diffusion kinetics in MB  
145 or riboflavin (Fig. S2). However, their kinetics were limited by diffusion in the absence of *S.*  
146 *oneidensis* MR-1 (Fig. S2). These data show that N5 molecules did not enhance  $i_c$  by a  
147 shuttling mechanism but rather by a direct electron transport process at the cell/electrode  
148 interface.

149 Stabilization of the N5 molecules in their SR form in Cyts was confirmed by the  
150 number of electrons involved in the redox reactions of all N5 molecules via differential pulse  
151 voltammetry (DPV) estimated from the half-width ( $\Delta E_{p/2}$ ) of the oxidation peak (48, 49) (Figs.  
152 S3 and S4). Unbound MB in a cell-free system showed a  $\Delta E_{p/2}$  of 55 mV which indicates a  
153 two-electron redox reaction (Fig. S3) (48, 49). The presence of *S. oneidensis* MR-1 cells  
154 changed the  $\Delta E_{p/2}$  of MB to 120 mV (Fig. S3). This value resembles that reported for the one-

155 electron redox reaction of flavin bound with Cyts (130 mV) (15, 20). Therefore, MB is  
156 stabilized in its SR form in the presence of MR-1. The peak MB current decreased upon the  
157 addition of the free radical scavenger  $\alpha$ -tocopherol (Fig. S5), which supports the formation of  
158 SR state (15, 50). The oxidative signal of MB showed a single peak corresponding to the SR  
159 state up to a concentration of 10  $\mu$ M (Fig. S6). Thereafter, the increase of MB concentration  
160 gradually shifted the peak potential ( $E_p$ ) towards the  $E_p$  of oxidation peak in two-electron  
161 reaction (Fig. S7). Therefore, MB would serve as a bound cofactor below 10  $\mu$ M  
162 concentration in our experimental setup. In contrast, a one-electron oxidation peak was not  
163 detected for  $\alpha$ -AQS (without N5) in the DP voltammogram (Fig. S8). These data demonstrate  
164 that MB enhances the rate of EET in the SR state. The same trend for  $\Delta E_{p/2}$  was observed with  
165 TB, NMB, TN, RS, and DMMB (Fig. S4). These results suggest that the N5 atom in the  
166 polycyclic backbone is the critical structural component of flavin analogs, which enables  
167 them to function in the SR state as bound cofactors in Cyts. The formation of the SR state  
168 with electron flow enhancement is reminiscent of the SQ states observed in numerous  
169 microbial electron bifurcation reactions (33). Some of these have been confirmed in the  
170 crystal structures of flavodoxins in the oxidized quinone, semiquinone, and hydroquinone  
171 forms (51). It seems possible that the SR state is stabilized by donation of a hydrogen bond to  
172 N5 from the Cyts scaffold, as observed in flavodoxins (52).

173 To confirm whether the redox cycle of bound cofactors could couple with protonation as  
174 with that of SQ in flavodoxins, we evaluated the effects of bulk solution pH on the redox  
175 potential ( $E_0$ ) using the oxidation peaks in DP voltammograms. When a bulk solution was  
176 acidified in the presence of *S. oneidensis* MR-1 and each cofactor at 2  $\mu$ M, the  $E_0$  of the N5  
177 molecules, including riboflavin, linearly decreased upon pH increase, which indicates a  
178 proton-coupled electron transfer reaction (Fig. 2). On the other hand, the observed slope  
179 values were lower than expected (riboflavin: -13 mV pH<sup>-1</sup>; MB: -34 mV pH<sup>-1</sup>; TB: -32 mV  
180 pH<sup>-1</sup>; NMB: -30 mV pH<sup>-1</sup>; and TN: -21 mV pH<sup>-1</sup> (Fig. 2)). Similar deviations from the -59  
181 mV pH<sup>-1</sup> slope were reported for SQs in certain flavodoxins and flavoproteins forming  
182 hydrogen bonds with protein scaffolds via N5 (53-55). The absence of the corresponding  
183 deviation in the free state flavins and quinones (53, 55) suggests that the low pH-dependence  
184 of  $E_0$  could be due to conformational changes of the protein structure, which originates from  
185 changes of the protonation states of the titratable sites.

186



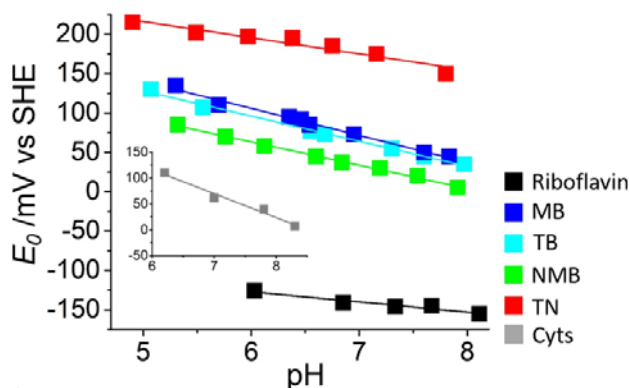

187

188 **Fig. 2.**  $E_0$  of the bound cofactors (riboflavin, MB, TB, NMB, and TN) determined by DPV as  
189 a function of bulk solution pH. The slopes for the plots are riboflavin:  $-13 \text{ mV pH}^{-1}$ ; MB:  $-34$   
190  $\text{mV pH}^{-1}$ ; TB:  $-32 \text{ mV pH}^{-1}$ ; NMB:  $-30 \text{ mV pH}^{-1}$ ; and TN:  $-21 \text{ mV pH}^{-1}$ . Inset:  $E_0$  of Cyts  
191 derived from the DPV of riboflavin-bound Cyts. The slope was  $-47 \text{ mV pH}^{-1}$  which is near the  
192 reported value for MtrC, a subunit of Cyts (56).

193

194 Given that the flavins receive electrons from the heme group(s) of Cyts, we previously  
195 posited that molecules with higher  $E_0$  could be more favorable for the acceleration of EET in  
196 our condition (+0.4 vs. SHE) (15, 32). It is evident from Fig. 1B that the extent of EET rate  
197 enhancement varies depending upon the binding N5 molecules. Unexpectedly, the EET rate  
198 did not increase with higher  $E_0$  in some N5 molecules (Fig. 3A). We approximated the  
199 capability of EET from the max  $i_c$  value ( $I_c$ ) in the 10-h measurements of each of the N5  
200 molecules at the concentration of the Cyts complex with bound cofactors (Fig. S9 and Table  
201 S1). Their  $E_0$  were estimated by DPV (Figs. S3 and S4). It was assumed that the N5  
202 molecules act as bound cofactors up to a concentration of  $10 \mu\text{M}$  because of the DPV data  
203 (Figs. S6 and S7), and the EET capability for each Cyts forming a complex with bound  
204 cofactor was estimated from the dissociation constant ( $K_d$ ) at the N5 molecule concentrations  
205 of  $2\text{--}10 \mu\text{M}$  (Fig. S9). As shown in Fig. 3A, the EET rate increased with  $E_0$  for the N5  
206 molecules  $<+50 \text{ mV}$  (vs. SHE). However, this tendency does not hold true for N5 molecules  
207 with higher  $E_0$ . The EET rate for RS was low possibly due to a low overpotential to be  
208 oxidized by the electrode. Nevertheless, the cutoff was nearly identical to  $E_0$  for Cyts (+50  
209  $\text{mV}$  vs. SHE) (15, 32). The N5 molecules with  $E_0 >+50 \text{ mV}$  accept electrons from Cyts in a  
210 thermodynamically favorable downhill reaction. Thus, the suppression of EET rate could not  
211 originate from energetics of electron transfer.

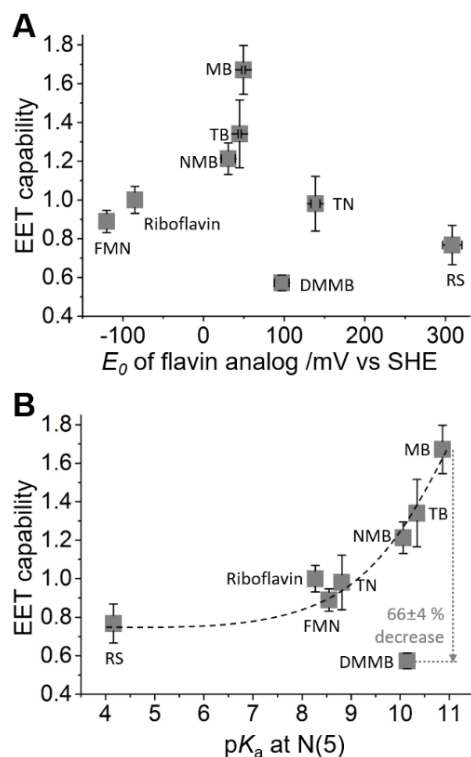

212

213 **Fig. 3.** EET capabilities of *S. oneidensis* MR-1 with each N5 molecule as a function of the  $E_0$   
214 of each cofactor (A) and  $pK_a$ (N5) in one-electron reduced form (B). The  $E_0$  for all cofactors  
215 bound to Cyts except FMN and riboflavin were determined by differential pulse voltammetry  
216 (DPV) (Figs. S3 and S4). The  $E_0$  for FMN and riboflavin were obtained from the literature  
217 (15, 20). The  $pK_a$ (N5) were calculated using a quantum chemical approach (Figs. S10 and  
218 S11).  $pK_a$ (N5) of FMN and riboflavin were obtained from the literature (19). Error bars  
219 represent the mean  $\pm$  SEM for  $\geq$ three individual experiments. The gray dotted line shows the  
220 suppression of the EET capability of DMMB relative to MB. The dashed line is for visual  
221 guidance and orientation.

222

223 We compared  $pK_a$ (N5) with the EET capability of each N5 molecule.  $pK_a$ (N5) in the SR  
224 state was calculated using a quantum chemical approach, as demonstrated for 28 reference  
225 compounds (Figs. S10 and S11) (57, 58). EET capability increased with  $pK_a$ (N5) in the SR  
226 form (Fig. 3B). The increase in current production at high  $pK_a$ (N5) suggests that the N5  
227 protonation of the singly reduced cofactor limits the rate of EET. Nucleophilicity at N5 was  
228 also estimated by the Hammett substituent parameters. EET capability increased with the  
229 increase of nucleophilicity at N5 (Fig. S12 and Table S2). Meanwhile, DMMB with  $pK_a$   
230 10.14 showed  $\sim 66 \pm 4\%$  lower EET capability than MB (Fig 3B). Since DMMB has the  
231 identical backbone structure with MB except for methyl groups at the vicinity of N5 moiety in

232 the isoalloxazine ring, strict suppression of EET capability in DMMB may be caused by  
233 prevention of protonation at N5. In contrast, there was no clear relationship between current  
234 production and  $pK_a$  value in the two-electron reduced form (Fig. S13). In the electron-  
235 shuttling mechanism involving a two-electron redox process, the rate limiting factors for EET  
236 are the diffusion constant and the  $E_0$  value (59). The distinct rate-limiting step from shuttling  
237 mechanism supports the bound-cofactor mechanism of the N5 molecules which mediate one-  
238 electron redox process as binding SR species, and supports the importance of proton uptake  
239 capability at N5 in EET kinetics.

240 To analyze the rate-limiting step in EET, we evaluated the kinetic isotope effect (KIE)  
241 using a highly reproducible *S. oneidensis* MR-1 monolayer biofilm (47, 60). We added  
242 deuterated water ( $\leq 4\%$ ; subtoxic concentration) to the bulk solution during current  
243 production of the MR-1 monolayer biofilm in the presence of 2.0  $\mu\text{M}$  of each cofactor  
244 molecule. A previously reported experimental setup was used (47, 60). As the  $i_c$  was limited  
245 by the EET process, the KIE could characterize the rate-limiting proton transfer process  
246 through cofactor-bound Cyts (47). The influence of the KIE on the EET rate was evaluated  
247 from the differences in current production 10 min after  $\text{D}_2\text{O}$  and  $\text{H}_2\text{O}$  ( $i_c(\text{H}_2\text{O})/i_c(\text{D}_2\text{O})$ ) were  
248 added to the electrochemical system. The amount of cofactor-bound Cyts complex was  
249 normalized by a dissociation constant ( $K_d$ ) in the presence and absence of 4%  $\text{D}_2\text{O}$  (Fig. S9).  
250  $\text{D}_2\text{O}$  lowered current production within 10 s in the presence of TN (Fig. 4A). Further addition  
251 of  $\text{D}_2\text{O}$  up to a final concentration of 4% continued to reduce the current (Fig. 4C). In contrast,  
252 the current increased by  $\text{D}_2\text{O}$  addition in the presence of MB (Fig. 4B). The lower  $K_d$  value of  
253 MB was estimated in the presence of  $\text{D}_2\text{O}$  (Fig. S9), and it caused the higher  $i_c$ . The KIE for  
254 the cofactor-bound Cyts normalized to  $1.06 \pm 0.07$ , and those of riboflavin and TN were  $1.35$   
255  $\pm 0.03$  and  $1.46 \pm 0.10$ , respectively (Fig. 4D). These KIE values were larger than those  
256 measured in the presence of 100  $\mu\text{M}$   $\alpha$ -AQS (gray dashed line in Fig. 4D), where the EET rate  
257 is limited by diffusion of  $\alpha$ -AQS (47), strongly suggesting that the observed KIE values are  
258 assigned to riboflavin- and TN-bound Cyts. Therefore, the KIE data indicate that the EET  
259 mediated by cofactor-bound Cyts is limited by proton transport process. Substantial  
260 differences in KIE were detected when the cofactors in the Cyts were replaced. Therefore,  
261 each cofactor has its own unique KIE, and each N5 protonation/deprotonation most likely  
262 limits the EET rate. This finding is consistent with a previous report which suggested an  
263 association of rate-limiting proton transport with electron transport in flavin-bound Cyts (47).  
264

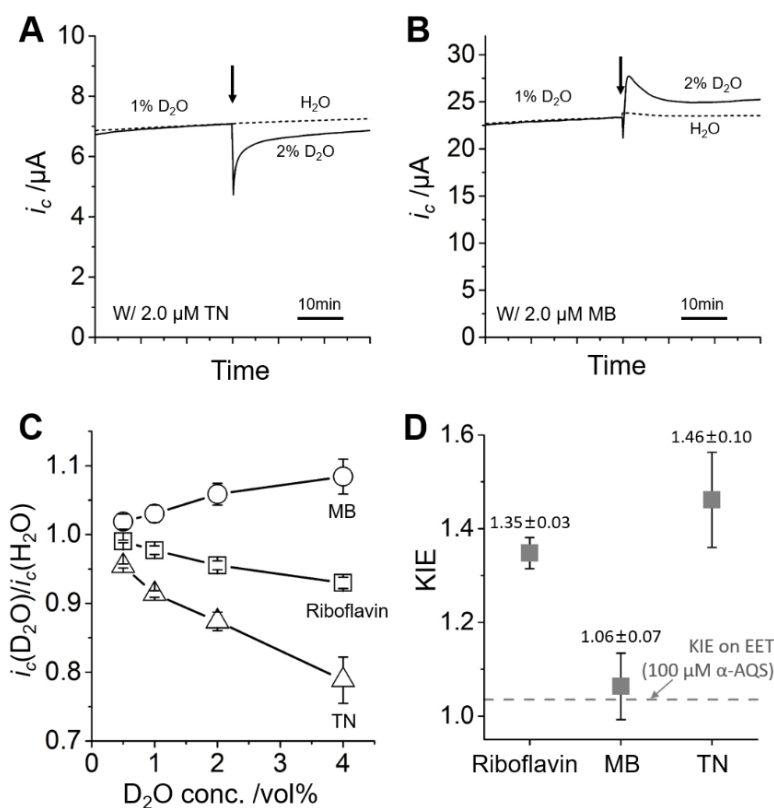

265

266 **Fig. 4.** Effect of deuterium ion on EET kinetics in the presence of redox molecules.  
 267 Representative time course for current production in the *S. oneidensis* MR-1 monolayer  
 268 biofilm in the presence of 2.0  $\mu\text{M}$  TN (A) and MB (B). The arrows indicate the time points of  
 269  $\text{D}_2\text{O}$  (solid line) or  $\text{H}_2\text{O}$  (dotted line) addition. Data corresponding to the dotted line were  
 270 normalized to the data point immediately before  $\text{D}_2\text{O}$  addition in the solid line data. (C) Effect  
 271 of  $\text{D}_2\text{O}$  addition at subtoxic concentrations ( $\leq 4\%$  v/v) on  $i_c$  in the presence of 2.0  $\mu\text{M}$  MB  
 272 (circle plots) or TN (triangle plots). Data for 2.0  $\mu\text{M}$  riboflavin (square plots) were obtained  
 273 from the literature (47) for comparison. Error bars represent the mean  $\pm$  SEM for  $\geq$ three  
 274 experiments in separate reactors. (D) Kinetic isotope effect (KIE) on the EET per unit  
 275 concentration of the cofactor-bound Cyts complexes in 4% (v/v)  $\text{D}_2\text{O}$ . Error bars represent  
 276 mean  $\pm$  SEM for  $\geq$ three experiments in separate reactors. Gray dashed line represents the KIE  
 277 on EET for 4% (v/v)  $\text{D}_2\text{O}$  in the presence of 100  $\mu\text{M}$   $\alpha$ -AQS reported in ref. (47). Numeric  
 278 data are indicated above each plot.

279

280 The rate-limiting proton transfer is associated with the electron transfer from the hemes  
 281 in the Cyts to the bound cofactors, and  $E_0$  potentially affect the EET rate (Fig. 3A).  
 282 Consequently, any alteration in the  $E_0$  gap between Cyts and bound cofactors may increase  
 283 the KIE values. To confirm that the observed KIE values were derived substantially from

284 rate-limiting proton transfer rather than any change in  $E_0$  in the presence of  $D_2O$ , we  
285 evaluated the  $E_p$  of Cyts, riboflavin, TN, and MB after  $D_2O$  addition. Fig. 5 shows  
286 representative oxidation peaks obtained from the DP voltammograms of *S. oneidensis* MR-1  
287 monolayer biofilm in the presence of 2.0  $\mu M$  riboflavin, TN, or MB before and after the  
288 addition of 4%  $D_2O$ . To determine  $E_p$  values, subtraction and deconvolution were conducted  
289 using an open source program SOAS (61). In  $D_2O$ , not only a positive shift in the  $E_p$  of  $\sim 25$   
290 mV for hemes in the Cyts but also a positive shift in the  $E_p$  of  $\sim 25$  mV for bound riboflavin  
291 were observed, without changing the  $E_p$  difference (Fig. 5A). The  $E_p$  for TN also positively  
292 shifted, and the  $E_p$  gap between Cyts and TN was also almost identical (Fig. 5B). Peaks of  
293 Cyts and MB were overlapped in both before and after addition of  $D_2O$  (Fig. 5C), indicating  
294 little impact of  $D_2O$  on  $E_p$  gap as well. Decrease of peak width in the presence of  $D_2O$  may  
295 originate from the increase of MB/Cyts ratio contributing on the oxidation peak, which is  
296 consistent with higher affinity of MB with Cyts in the presence of  $D_2O$  (Fig. S9). Collectively,  
297  $E_p$  gap between Cyts and bound cofactors were scarcely influenced by  $D_2O$ , further  
298 supporting that the observed KIE values in Fig. 4 were derived substantially from rate-  
299 limiting proton transfer via N5 of the bound cofactors.

300

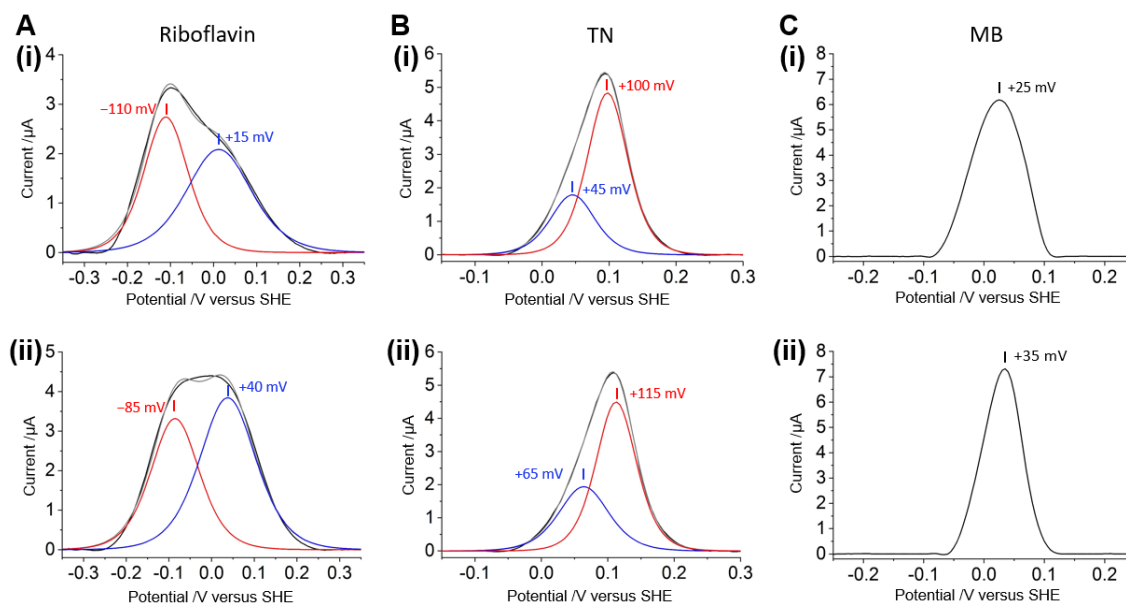

301

302 **Fig. 5.** Baseline subtracted differential pulse (DP) voltammograms of the *S. oneidensis* MR-1  
303 monolayer biofilm in the presence of 2.0  $\mu M$  riboflavin (A), TN (B), and MB (C). (i) and (ii)  
304 represent the data before and after the addition of 4% (v/v) deuterium oxide, respectively.  
305 Black and gray lines are baseline subtracted DP voltammograms and fitted lines, respectively.  
306 Red and blue lines represent oxidation peaks deconvoluted from fitted line. According to (15,  
307 20), the blue peak is assigned to the Cyts and the red peak is assigned to a bound cofactor.

308 The oxidative peaks in panel (C) were not able to be deconvoluted by SOAS because they  
309 overlapped.

310

311 The extent of current suppression by deuterated water was much larger than those  
312 determined when the EET kinetics is limited by diffusion process of proton donor for N5 (Fig.  
313 4D). Assuming protons are delivered to N5 via diffusing water or buffer molecules in bulk  
314 solution and it limits the rate of EET, the ratio of the cofactor proceeding EET with  $D^+/H^+$  is  
315 correlated with the percentage of heavy water added, i.e., the extent of current suppression is  
316 lower than the percentage of deuterated water added (62, 63). However, we observed the KIE  
317 values  $>1.04$  in the presence of 4%  $D_2O$  (Fig. 4D), indicating that diffusion of free water or  
318 buffer molecule do not limit the rate of EET. Some enzymes with several protonic sites  
319 transporting more than one proton suppress the rate of coupled electron transport over the  
320 ratio of added deuterated water as indicated in the Gross-Butler model (62, 64, 65). Given  
321 such protonation kinetics is not possible for free flavin or quinone, the observed large KIE  
322 further confirms our finding that the protonation of bound-cofactor limits the rate of EET via  
323 Cyts.

324 The EET kinetics through Cyts was reported to be limited by proton transfer reaction in  
325 the absence of SR cofactor molecules (47). Therefore, high EET acceleration by cofactors  
326 may be the result of an increase in the rate of proton transfer coupled with the EET. Given  
327 EET links with the localization of protons across the inner-membrane as well in the absence  
328 of the bound cofactors (47, 66), it is of great interest to clarify detailed molecular mechanisms  
329 of EET-coupled complex proton transport to understand energy acquisition machinery of  
330 EET-capable bacteria in the presence and absence of the bound cofactors.

331

332

### 333 Conclusions

334 We demonstrated that the basicity of N5 enhances the rate of EET when flavin is  
335 stabilized as SQ in Cyts of *S. oneidensis* MR-1. Therefore, high EET acceleration by the SQ  
336 intermediate in spite of unfavorable electron energetics may result from enhancement of  
337 proton transfer rate coupled with the EET. Significant variations in EET enhancement caused  
338 by flavin analogs and quinones are also explained by the function of N5, the proton uptake  
339 capability and the ability to form SR state binding with Cyts (Fig. 6). It is of great interest to  
340 test the function of N5 with the EET-capable bacterium *Geobacter sulfurreducens* and the  
341 pathogen *Listeria monocytogene* which use bound-flavin based EET mechanism as well (16,  
342 35, 36). Understanding the role of the N5 and SR state associated with EET may help  
343 elucidate the function of redox bifurcation in biological systems, and could provide novel  
344 direction to control environmental and pathogenic bacterial activity.

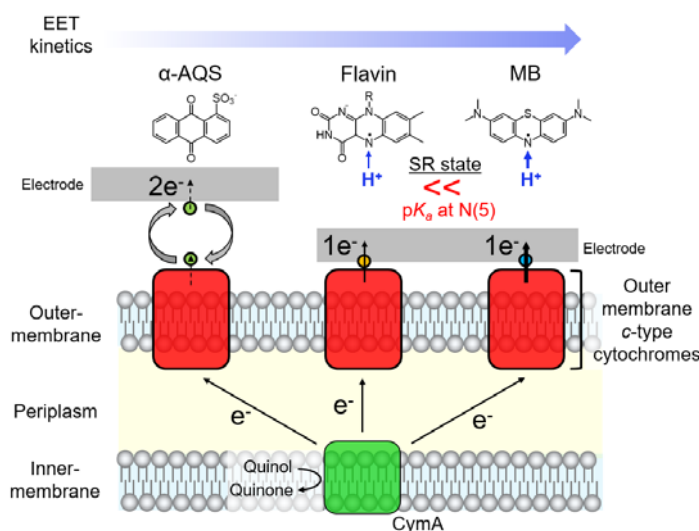

345

346 **Fig. 6.** Schematic representation of the molecular control of respiratory electron outflow in *S.*  
347 *oneidensis* MR-1 mediated by flavin, flavin analogs, and quinones.



## 348 **Methods**

349

### 350 ***Strains and culture conditions***

351 *Shewanella oneidensis* MR-1 cells were grown aerobically at 30 °C for 24 h in 15 mL  
352 Luria-Bertani (LB) medium (25 g L<sup>-1</sup>). The cell suspension was centrifuged at 6,000 × g for  
353 10 min. The cell pellet was resuspended in 15 mL of a medium consisting of DM: NaHCO<sub>3</sub>  
354 [2.5 g L<sup>-1</sup>], CaCl<sub>2</sub>·2H<sub>2</sub>O [0.08 g L<sup>-1</sup>], NH<sub>4</sub>Cl [1.0 g L<sup>-1</sup>], MgCl<sub>2</sub>·6H<sub>2</sub>O [0.2 g L<sup>-1</sup>], NaCl [10 g  
355 L<sup>-1</sup>], yeast extract [0.5 g L<sup>-1</sup>], and (2-[4-(2-hydroxyethyl)-1-piperazinyl] ethanesulfonic acid  
356 [HEPES; 7.2 g L<sup>-1</sup>] (pH 7.8) supplemented with 10 mM lactate as the carbon source for *S.*  
357 *oneidensis* MR-1. The cells were cultured aerobically at 30 °C for 12 h and centrifuged at  
358 6,000 × g for 10 min. The cell pellet was washed twice with DM medium by centrifugation  
359 for 10 min at 6,000 × g. A mutant strain lacking the genes encoding Cyts ( $\Delta omcAll$ ; deletions  
360 of *SO1778-SO1782*, *SO2931*, and *SO1659*) was constructed as previously described (67).

361

### 362 ***Electrochemical measurements of the catalytic current generated by lactate oxidation ( $i_c$ ) in*** 363 ***S. oneidensis MR-1 with each redox molecule***

364 A single-chamber, three-electrode system for whole-cell electrochemistry was  
365 constructed as previously described (15, 22). An indium tin-doped oxide (ITO) substrate  
366 (surface area: 3.1 cm<sup>2</sup>) was placed at the bottom of the reactor and used as the working  
367 electrode. Ag/AgCl (saturated KCl) and a platinum wire (surface area: ~10 mm<sup>2</sup>) were used as  
368 the reference- and counter- electrodes, respectively. DM 4.0 mL (pH 7.8) containing each  
369 redox molecule (Fig. 1A) and 10 mM lactate as the sole electron donor was de-aerated by  
370 bubbling with N<sub>2</sub> for > 20 min. It was then added to the electrochemical cell as an electrolyte.  
371 The concentration of flavin analogs and quinones was set to 2.0 μM unless otherwise  
372 indicated. The reactor was maintained at a temperature of 30 °C and was not stirred during  
373 measurements. Cell suspensions with OD<sub>600</sub> = 0.1 were inoculated into the reactor. The  
374 working electrode was poised at +0.4 V vs. the standard hydrogen electrode (SHE).  
375 Electrochemistry-based experimental details about estimation of dissociation constant ( $K_d$ ),  
376 EET capability, and KIE value are described in Supporting information.

377

### 378 ***Formation of the S. oneidensis MR-1 monolayer biofilm on the ITO electrode***

379 DM 4.0 mL (pH 7.8) with 10 mM lactate was added to the electrochemical cell as  
380 an electrolyte and was de-aerated by bubbling with N<sub>2</sub> for > 20 min. The *S. oneidensis* MR-1  
381 cell suspension with OD<sub>600</sub> = 0.1 was grown in the reactor. The working electrode was poised  
382 at +0.4 V vs. SHE in the presence of 10 mM lactate as the sole electron donor. The bacteria



383 were incubated at 30 °C with no agitation for 25 h. Formation of the monolayer biofilm was  
384 confirmed by *in situ* confocal fluorescence microscopy as previously described (32).

385

### 386 ***Voltammetry conditions***

387 Cyclic voltammetry (CV) and differential pulse voltammetry (DPV) were conducted to  
388 determine the electrochemical properties of the flavin analogs and quinones and the *S.*  
389 *oneidensis* MR-1 monolayer biofilm via an automatic polarization system (VMP3; BioLogic  
390 Science Instruments, Seyssinet-Pariset, France). DPV was conducted under the following  
391 conditions: 5.0 mV pulse increments, 50 mV pulse amplitude ( $\Delta E_{pa}$ ), 300 ms pulse width, and  
392 5.0 s pulse period.  $E_0$  was approximated from the equation  $E_0 = E_p + (\Delta E_{pa}/2)$  (48), thus,  $E_0$   
393 was estimated to be 25 mV more positive than the peak potential ( $E_p$ ) observed in DPV. To  
394 determine the peak potential ( $E_p$ ), half-width ( $\Delta E_{p/2}$ ), and oxidation peak intensity in DPV, the  
395 background current was subtracted by fitting the baseline of regions remote from the peak and  
396 assuming a similar smooth charging current throughout the peak region. The subtraction was  
397 performed in the open source program SOAS (61).

398

### 399 ***Calculation of the acid-base equilibrium dissociation constants (pK<sub>a</sub>) in redox active*** 400 ***molecules.***

401 To compute the absolute pK<sub>a</sub> values, we employed a quantum chemical approach (57).  
402 In the deprotonation reaction of the protonated state (AH) to deprotonated state (A<sup>-</sup>) in  
403 aqueous solution, pK<sub>a</sub> is defined as

$$404 \quad \text{p}K_a = \frac{\Delta G_{\text{aq}}}{2.303 RT} \quad (\text{eq. 1})$$

405 where  $\Delta G_{\text{aq}}$  is the free energy difference between AH and (A<sup>-</sup> + H<sup>+</sup>) in water (i.e.,  $\Delta G_{\text{aq}} =$   
406  $G_{\text{aq}}(\text{A}^-) + G_{\text{aq}}(\text{H}^+) - G_{\text{aq}}(\text{AH})$ ),  $R$  is the gas constant, and  $T$  is the temperature.  $\Delta G_{\text{aq}}$  can also  
407 be written as

$$408 \quad \Delta G_{\text{aq}} = \Delta G_{\text{gas}} + \Delta G_{\text{solv}}(\text{A}^-) + \Delta G_{\text{solv}}(\text{H}^+) - \Delta G_{\text{solv}}(\text{HA}) \quad (\text{eq. 2})$$

$$409 \quad \Delta G_{\text{gas}} = G_{\text{gas}}(\text{A}^-) + G_{\text{gas}}(\text{H}^+) - G_{\text{gas}}(\text{AH}) \quad (\text{eq. 3})$$

410 The free energy  $G_{\text{gas}}$  in vacuum can be obtained, using the following equation;

$$411 \quad G_{\text{gas}} = E_0 + ZPE + \Delta G_{0 \rightarrow 298\text{K}} \quad (\text{eq. 4})$$

412 where  $E_0$  is the ground-state energy in vacuum,  $ZPE$  is the zero-point vibrational energy, and  
413  $\Delta G_{0 \rightarrow 298\text{K}}$  is the thermal vibrational free energy at 298 K. For proton, the free energy  $G_{\text{gas}}(\text{H}^+)$   
414 of 6.28 kcal/mol and  $\Delta G_{\text{solv}}(\text{H}^+)$  of 265.74 kcal/mol were used (57). To obtain  $E_0$ ,  $ZPE$ , and  
415  $\Delta G_{0 \rightarrow 298\text{K}}$ , full geometry optimizations were carried out using the restricted DFT method for

416 the non-radical states and the unrestricted DFT method for the radical states with the B3LYP  
417 functional and 6-31g\*\* basis sets, and we used the Jaguar program code (68). Vibrational  
418 frequencies and electrostatic potentials were calculated using the geometry-optimized  
419 structures at the same level of theory. To calculate the ground-state electronic energy  $E_0$ , we  
420 employed cc-pvqz basis sets for accuracy.

421 The solvation energy  $\Delta G_{\text{solv}}$  was calculated by solving the Poisson equation using  
422 the Solvate module from MEAD (69), where van der Waals radii for H, N, O, Cl, and  
423 titratable  $\text{H}^+$  are 1.2, 1.4, 1.4, 1.9, and 1.0 Å, respectively; C for  $-\text{CH}_3$  and  $-\text{CH}_2-$  groups are  
424 2.0 Å, whereas C for others are 1.2 Å (57). Atomic partial charges used for  $\Delta G_{\text{solv}}$  were  
425 determined by the restraint-electrostatic-potential (RESP) method (70-72).

426 To evaluate the accuracy of the method, we calculated  $\text{p}K_{\text{a}}$  values for 28 compounds  
427 whose experimentally measured  $\text{p}K_{\text{a}}$  values are reported (i.e., ref. (73) for  $\text{H}_2\text{O}$  and  $\text{NH}_4^+$  and  
428 ref. (57) for other compounds) (Fig. S10B). We reproduced the experimentally measured  $\text{p}K_{\text{a}}$   
429 values with a root-mean square deviation of 0.94 and a maximum error of 1.77 in  $\text{p}K_{\text{a}}$  units  
430 (Fig. S11).

431 **Acknowledgements**

432 The authors thank Prof. Hiroyuki Noji and Prof. Kohei Uosaki for their helpful advice. This  
433 work was financially supported by JST CREST (No. JPMJCR1656), JSPS KAKENHI (No.  
434 24000010 to K.H., No. 17H04969 to A. O., No. 17J02602 to Y.T., No. JP26800224 to K.S.,  
435 No. JP16H06560 to K.S and H.I., and No. JP26105012 to H.I.), the Japan Agency for  
436 Medical Research and Development (AMED), the US Office of Naval Research Global (No.  
437 N62909-17-1-2038), the Materials Integration for Engineering polymers of the Cross-  
438 ministerial Strategic Innovation Promotion Program (SIP), and the Interdisciplinary  
439 Computational Science Program in CCS, University of Tsukuba. Y.T. is a JSPS Research  
440 Fellow and supported by JSPS through the Program for Leading Graduate Schools (MERIT).

441

442 **Author contributions**

443 Y.T. and A.O. conceived and designed the study. Y.T. conducted the experiments and  
444 analyses. K.S., R.H., and H.I. conducted the theoretical calculations. Y.T., K.H.N., K.H., H.I.,  
445 and A.O. wrote the manuscript.

446

447 **Competing financial interests**

448 The authors declare that there are no competing financial interests.

449

450 **Materials & Correspondence**

451 OKAMOTO.Akihiro@nims.go.jp

452

## 453 References

454

- 455 1. Lovley DR & Phillips EJ (1988) Novel mode of microbial energy metabolism: organic  
456 carbon oxidation coupled to dissimilatory reduction of iron or manganese. *Appl.*  
457 *Environ. Microbiol.* 54(6):1472-1480.
- 458 2. Myers CR & Nealson KH (1988) Bacterial Manganese Reduction and Growth with  
459 Manganese Oxide as the Sole Electron-Acceptor. *Science* 240(4857):1319-1321.
- 460 3. Kim BH, Kim HJ, Hyun MS, & Park DH (1999) Direct electrode reaction of Fe(III)-  
461 reducing bacterium, *Shewanella putrefaciens*. *J. Microbiol. Biotechnol.* 9(2):127-131.
- 462 4. Bond DR, Holmes DE, Tender LM, & Lovley DR (2002) Electrode-reducing  
463 microorganisms that harvest energy from marine sediments. *Science* 295(5554):483-  
464 485.
- 465 5. Summers ZM, *et al.* (2010) Direct Exchange of Electrons Within Aggregates of an  
466 Evolved Syntrophic Coculture of Anaerobic Bacteria. *Science* 330(6009):1413-1415.
- 467 6. McGlynn SE, Chadwick GL, Kempes CP, & Orphan VJ (2015) Single cell activity  
468 reveals direct electron transfer in methanotrophic consortia. *Nature* 526(7574):531-  
469 535.
- 470 7. Logan BE, *et al.* (2006) Microbial fuel cells: Methodology and technology. *Environ.*  
471 *Sci. Technol.* 40(17):5181-5192.
- 472 8. Busalmen JP, Esteve-Nunez A, Berna A, & Feliu JM (2008) C-type cytochromes wire  
473 electricity-producing bacteria to electrodes. *Angew. Chem. Int. Ed.* 47(26):4874-4877.
- 474 9. Leung KM, *et al.* (2013) *Shewanella oneidensis* MR-1 Bacterial Nanowires Exhibit p-  
475 Type, Tunable Electronic Behavior. *Nano Lett.* 13(6):2407-2411.
- 476 10. Bond DR & Lovley DR (2003) Electricity production by *Geobacter sulfurreducens*  
477 attached to electrodes. *Appl. Environ. Microbiol.* 69(3):1548-1555.
- 478 11. Gregory KB, Bond DR, & Lovley DR (2004) Graphite electrodes as electron donors  
479 for anaerobic respiration. *Environ. Microbiol.* 6(6):596-604.
- 480 12. Marsili E, *et al.* (2008) *Shewanella* Secretes flavins that mediate extracellular electron  
481 transfer. *Proc. Natl. Acad. Sci. USA* 105(10):3968-3973.
- 482 13. Jiang J & Kappler A (2008) Kinetics of microbial and chemical reduction of humic  
483 substances: Implications for electron shuttling. *Environ. Sci. Technol.* 42(10):3563-  
484 3569.
- 485 14. Kotloski NJ & Gralnick JA (2013) Flavin Electron Shuttles Dominate Extracellular  
486 Electron Transfer by *Shewanella oneidensis*. *Mbio* 4(1): e00553-12.
- 487 15. Okamoto A, Hashimoto K, Nealson KH, & Nakamura R (2013) Rate enhancement of

- 488 bacterial extracellular electron transport involves bound flavin semiquinones. *Proc.*  
489 *Natl. Acad. Sci. USA* 110(19):7856-7861.
- 490 16. Okamoto A, *et al.* (2014) Uptake of self-secreted flavins as bound cofactors for  
491 extracellular electron transfer in *Geobacter* species. *Energy Environ. Sci.* 7(4):1357-  
492 1361.
- 493 17. Edwards MJ, *et al.* (2015) Redox Linked Flavin Sites in Extracellular Decaheme  
494 Proteins Involved in Microbe-Mineral Electron Transfer. *Sci Rep* 5:11677.
- 495 18. Xu S, Jangir Y, & El-Naggar MY (2016) Disentangling the roles of free and  
496 cytochrome-bound flavins in extracellular electron transport from *Shewanella*  
497 *oneidensis* MR-1. *Electrochim. Acta.* 198:49-55.
- 498 19. Draper RD & Ingraham LL (1968) A potentiometric study of the flavin semiquinone  
499 equilibrium. *Arch. Biochem. Biophys.* 125(3):802-808.
- 500 20. Okamoto A, *et al.* (2014) Cell-secreted Flavins Bound to Membrane Cytochromes  
501 Dictate Electron Transfer Reactions to Surfaces with Diverse Charge and pH. *Sci. Rep.*  
502 4: 5628.
- 503 21. Liu XW, *et al.* (2013) Phenothiazine Derivative-Accelerated Microbial Extracellular  
504 Electron Transfer in Bioelectrochemical System. *Sci. Rep.* 3: 01616.
- 505 22. Tokunou Y, Hashimoto K, & Okamoto A (2016) Acceleration of Extracellular Electron  
506 Transfer by Alternative Redox-Active Molecules to Riboflavin for Outer-Membrane  
507 Cytochrome *c* of *Shewanella oneidensis* MR-1. *J. Phys. Chem. C* 120(29):16168-  
508 16173.
- 509 23. Xu S, Barrozo A, Tender LM, Krylov AI, & El-Naggar MY (2018) Multiheme  
510 Cytochrome Mediated Redox Conduction through *Shewanella oneidensis* MR-1 Cells.  
511 *J. Am. Chem. Soc.* 140(32):10085-10089.
- 512 24. Xiong YJ, *et al.* (2006) High-affinity binding and direct electron transfer to solid  
513 metals by the *Shewanella oneidensis* MR-1 outer membrane *c*-type cytochrome OmcA.  
514 *J. Am. Chem. Soc.* 128(43):13978-13979.
- 515 25. Firer-Sherwood M, Pulcu GS, & Elliott SJ (2008) Electrochemical interrogations of  
516 the Mtr cytochromes from *Shewanella*: opening a potential window. *J. Biol. Inorg.*  
517 *Chem.* 13(6):849-854.
- 518 26. Nakamura R, Ishii K, & Hashimoto K (2009) Electronic Absorption Spectra and  
519 Redox Properties of *C* Type Cytochromes in Living Microbes. *Angew. Chem. Int. Ed.*  
520 48(9):1606-1608.
- 521 27. Hartshorne RS, *et al.* (2009) Characterization of an electron conduit between bacteria  
522 and the extracellular environment. *Proc. Natl. Acad. Sci. USA* 106(52):22169-22174.

- 523 28. Breuer M, Rosso KM, & Blumberger J (2014) Electron flow in multiheme bacterial  
524 cytochromes is a balancing act between heme electronic interaction and redox  
525 potentials. *Proc. Natl. Acad. Sci. USA* 111(2):611-616.
- 526 29. Watanabe HC, Yamashita Y, & Ishikita H (2017) Electron transfer pathways in a  
527 multiheme cytochrome MtrF. *Proc Natl. Acad. Sci. USA* 114(11):2916-2921.
- 528 30. Watanabe HC, Yamashita Y, & Ishikita H (2017) Reply to Breuer et al.: Molecular  
529 dynamics simulations do not provide functionally relevant values of redox potential in  
530 MtrF. *Proc Natl. Acad. Sci. USA* 114(47):E10029-E10030.
- 531 31. Barrozo A, El-Nagggar MY, & Krylov AI (2018) Distinct Electron Conductance  
532 Regimes in Bacterial Decaheme Cytochromes. *Angew. Chem. Int. Ed.* 57(23):6805-  
533 6809.
- 534 32. Okamoto A, Nakamura R, & Hashimoto K (2011) In-vivo identification of direct  
535 electron transfer from *Shewanella oneidensis* MR-1 to electrodes via outer-membrane  
536 OmcA-MtrCAB protein complexes. *Electrochim. Acta.* 56(16):5526-5531.
- 537 33. Buckel W & Thauer RK (2018) Flavin-Based Electron Bifurcation, Ferredoxin,  
538 Flavodoxin, and Anaerobic Respiration With Protons (Ech) or NAD(+) (Rnf) as  
539 Electron Acceptors: A Historical Review. *Front. Microbiol.* 9:401.
- 540 34. Lubner CE, *et al.* (2017) Mechanistic insights into energy conservation by flavin-  
541 based electron bifurcation. *Nat. Chem. Biol.* 13(6):655-659.
- 542 35. Light SH, *et al.* (2018) A flavin-based extracellular electron transfer mechanism in  
543 diverse Gram-positive bacteria. *Nature* 562(7725):140-144.
- 544 36. You LX, *et al.* (2018) Flavins mediate extracellular electron transfer in Gram-positive  
545 *Bacillus megaterium* strain LLD-1. *Bioelectrochemistry* 119:196-202.
- 546 37. Clarke TA, *et al.* (2011) Structure of a bacterial cell surface decaheme electron conduit.  
547 *Proc. Natl. Acad. Sci. USA* 108(23):9384-9389.
- 548 38. Wang ZM, *et al.* (2015) Effects of soluble flavin on heterogeneous electron transfer  
549 between surface-exposed bacterial cytochromes and iron oxides. *Geochim.*  
550 *Cosmochim. Acta* 163:299-310.
- 551 39. Breuer M, Rosso KM, & Blumberger J (2015) Flavin Binding to the Deca-heme  
552 Cytochrome MtrC: Insights from Computational Molecular Simulation. *Biophys. J.*  
553 109(12):2614-2624.
- 554 40. Babanova S, *et al.* (2017) Outer membrane cytochromes/flavin interactions in  
555 *Shewanella* spp.-A molecular perspective. *Biointerphases* 12(2):021004.
- 556 41. Johs A, Shi L, Droubay T, Ankner JF, & Liang L (2010) Characterization of the  
557 Decaheme c-Type Cytochrome OmcA in Solution and on Hematite Surfaces by Small

- 558 Angle X-Ray Scattering and Neutron Reflectometry. *Biophys. J.* 98(12):3035-3043.
- 559 42. Tokunou Y, *et al.* (2018) Whole-cell circular dichroism difference spectroscopy  
560 reveals an *in vivo*-specific deca-heme conformation in bacterial surface cytochromes.  
561 *Chem. Commun.* 54(99):13933-13936.
- 562 43. Yu SS, Chen JJ, Liu XY, & Yu HQ (2018) Interfacial Electron Transfer from the Outer  
563 Membrane Cytochrome OmcA to Graphene Oxide in a Microbial Fuel Cell: Spectral  
564 and Electrochemical Insights. *ACS Energy Lett.* 3(10):2449-2456.
- 565 44. Tokunou Y & Okamoto A (2019) Geometrical Changes in the Hemes of Bacterial  
566 Surface *c*-Type Cytochromes Reveal Flexibility in Their Binding Affinity with  
567 Minerals. *Langmuir* 35(23):7529-7537
- 568 45. Grattieri M, Rhodes Z, Hickey DP, Beaver K, & Minteer SD (2019) Understanding  
569 Biophotocurrent Generation in Photosynthetic Purple Bacteria. *ACS Catal.* 9(2):867-  
570 873.
- 571 46. Kirchhofer ND, Rengert ZD, Dahlquist FW, Nguyen TQ, & Bazan GC (2017) A  
572 Ferrocene-Based Conjugated Oligoelectrolyte Catalyzes Bacterial Electrode  
573 Respiration. *Chem* 2(2):240-257.
- 574 47. Okamoto A, Tokunou Y, Shafeer K, & Hashimoto K (2017) Proton Transport in the  
575 Outer-Membrane Flavocytochrome Complex Limits the Rate of Extracellular Electron  
576 Transport. *Angew. Chem. Int. Ed.* 56(31):9082-9086.
- 577 48. Rifkin SC & Evans DH (1976) Analytical Evaluation of Differential Pulse  
578 Voltammetry at Stationary Electrodes Using Computer-Based Instrumentation. *Anal.*  
579 *Chem.* 48(14):2174-2180.
- 580 49. Bard AJ, Faulkner LR, Leddy J, & Zoski CG (1980) *Electrochemical methods:*  
581 *fundamentals and applications* (John Wiley & Sons, Inc., New York).
- 582 50. Burton GW, Joyce A, & Ingold KU (1983) Is Vitamin-E the Only Lipid-Soluble,  
583 Chain-Breaking Antioxidant in Human-Blood Plasma and Erythrocyte-Membranes.  
584 *Arch. Biochem. Biophys.* 221(1):281-290.
- 585 51. Ludwig ML, *et al.* (1997) Control of oxidation-reduction potentials in flavodoxin from  
586 *Clostridium beijerinckii*: The role of conformation changes. *Biochemistry* 36(6):1259-  
587 1280.
- 588 52. Ishikita H (2007) Influence of the protein environment on the redox potentials of  
589 flavodoxins from *Clostridium beijerinckii*. *J. Biol. Chem.* 282(35):25240-25246.
- 590 53. Corrado ME, Zanetti G, & Mayhew SG (1996) The redox potentials of flavodoxin  
591 from *Desulfovibrio vulgaris* and ferredoxin-NADP(+) reductase from *Spinacia*  
592 *oleracea* and their complexes. *Biochem. Soc. Trans.* 24(1):28-28.



- 593 54. Segal HM, Spatzal T, Hill MG, Udit AK, & Rees DC (2017) Electrochemical and  
594 structural characterization of *Azotobacter vinelandii* flavodoxin II. *Protein Sci.*  
595 26(10):1984-1993.
- 596 55. Iyanagi T (2019) Molecular mechanism of metabolic NAD(P)H-dependent electron-  
597 transfer systems: The role of redox cofactors. *Biochim. Biophys. Acta* 1860(3):233-258.
- 598 56. Hartshorne RS, *et al.* (2007) Characterization of *Shewanella oneidensis* MtrC: a cell-  
599 surface decaheme cytochrome involved in respiratory electron transport to  
600 extracellular electron acceptors. *J. Biol. Inorg. Chem.* 12(7):1083-1094.
- 601 57. Schmidt am Busch M & Knapp EW (2004) Accurate pK(a) determination for a  
602 heterogeneous group of organic molecules. *Chemphyschem* 5(10):1513-1522.
- 603 58. Matsui T, Baba T, Kamiya K, & Shigeta Y (2012) An accurate density functional  
604 theory based estimation of pK<sub>a</sub> values of polar residues combined with experimental  
605 data: from amino acids to minimal proteins. *Phys. Chem. Chem. Phys.* 14(12):4181-  
606 4187.
- 607 59. Wu YD, Liu TX, Li XM, & Li FB (2014) Exogenous Electron Shuttle-Mediated  
608 Extracellular Electron Transfer of *Shewanella putrefaciens* 200: Electrochemical  
609 Parameters and Thermodynamics. *Environ. Sci. Technol.* 48(16):9306-9314.
- 610 60. Tokunou Y, Hashimoto K, & Okamoto A (2018) Electrochemical Detection of  
611 Deuterium Kinetic Isotope Effect on Extracellular Electron Transport in *Shewanella*  
612 *oneidensis* MR-1. *J. Vis. Exp.* (134):57584.
- 613 61. Fourmond V, *et al.* (2009) SOAS: A free program to analyze electrochemical data and  
614 other one-dimensional signals. *Bioelectrochemistry* 76(1-2):141-147.
- 615 62. Schowen KB & Schowen RL (1982) Solvent Isotope Effects on Enzyme-Systems.  
616 *Method. Enzymol.* 87:551-606.
- 617 63. Elrod JP, Hogg JL, Quinn DM, Venkatasubban KS, & Schowen RL (1980) Protonic  
618 Reorganization and Substrate Structure in Catalysis by Serine Proteases. *J. Am. Chem.*  
619 *Soc.* 102(11):3917-3922.
- 620 64. Reece SY & Nocera DG (2009) Proton-Coupled Electron Transfer in Biology: Results  
621 from Synergistic Studies in Natural and Model Systems. *Annu. Rev. Biochem.* 78:673-  
622 699.
- 623 65. Jenson DL & Barry BA (2009) Proton-Coupled Electron Transfer in Photosystem II:  
624 Proton Inventory of a Redox Active Tyrosine. *J. Am. Chem. Soc.* 131(30):10567-  
625 10573.
- 626 66. Tokunou Y, Hashimoto K, & Okamoto A (2015) Extracellular Electron Transport  
627 Scarcely Accumulates Proton Motive Force in *Shewanella oneidensis* MR-1. *Bull.*



- 628            *Chem. Soc. Jpn.* 88(5):690-692.
- 629    67.    Bucking C, Popp F, Kerzenmacher S, & Gescher J (2010) Involvement and specificity  
630            of *Shewanella oneidensis* outer membrane cytochromes in the reduction of soluble and  
631            solid-phase terminal electron acceptors. *FEMS Microbiol. Lett* 306(2):144-151.
- 632    68.    Jaguar v (2008): Schroinger, LLC, New York, NY.
- 633    69.    Bashford D & Gerwert K (1992) Electrostatic calculations of the pK<sub>a</sub> values of  
634            ionizable groups in bacteriorhodopsin. *J. Mol. Biol.* 224(2):473-486.
- 635    70.    Besler BH, Merz JKM, & Kollman PA (1990) Atomic charges derived from  
636            semiempirical methods. *J. Comp. Chem.* 11(4):431-439.
- 637    71.    Bayly CI, Cieplak P, Cornell WD, & Kollman PA (1993) A well-behaved electrostatic  
638            potential based method using charge restraints for deriving atomic charges: the RESP  
639            model. *J. Phys. Chem.* 97:10269-10280.
- 640    72.    Breneman CM & Wiberg KB (1990) Determining atom-centered monopoles from  
641            molecular electrostatic potentials. The need for high sampling density in formamide  
642            conformational analysis. *J. Comput. Chem.* 11(3):361-373.
- 643    73.    Lide DR (2001) Handbook of chemistry and physics (Chemical Rubber Publishing,  
644            Cleveland).
- 645

646 **Figure legends**

647

648 **Fig. 1.** (A) Chemical structures of the redox molecules used in the present study. N5 in the  
649 isoalloxazine ring is circled in the chemical structure of flavin. Methylene blue (MB),  
650 toluidine blue (TB), new methylene blue (NMB), thionine (TN), resorufin (RS), and 1,9-  
651 dimethyl-methylene blue (DMMB) have N5, while anthraquinone-1-sulfonate ( $\alpha$ -AQS),  
652 anthraquinone-1,5-disulfonate (AQDS), 2-methyl-1,4-naphthoquinone (MNQ), and 2-  
653 hydroxy-1,4-naphthoquinone (HNQ) lack it. (B) Maximum catalytic current of microbial  
654 lactate oxidation in *S. oneidensis* MR-1 ( $I_c$ ) after 10 h measurement in the presence of each  
655 molecule shown in (A).  $I_c$  in the presence of flavin, flavin analogs, and quinones are  
656 represented as gray, red, and blue bars, respectively. Concentration of each redox molecule  
657 was set to 2.0  $\mu$ M. Error bars represent mean  $\pm$  SEM for  $\geq$ three individual experiments in  
658 separate reactors. (C)  $I_c$  vs. MB or  $\alpha$ -AQS concentration in the reactor. Blue dotted line  
659 represents  $I_c$  estimated by Fick's law according to the diffusion kinetics of  $\alpha$ -AQS between  
660 the cell and the electrode. Error bars represent the mean  $\pm$  SEM for  $\geq$ three individual  
661 experiments in separate reactors.

662

663 **Fig. 2.**  $E_0$  of the bound cofactors (riboflavin, MB, TB, NMB, and TN) determined by DPV as  
664 a function of bulk solution pH. The slopes for the plots are riboflavin: -13 mV pH<sup>-1</sup>; MB: -34  
665 mV pH<sup>-1</sup>; TB: -32 mV pH<sup>-1</sup>; NMB: -30 mV pH<sup>-1</sup>; and TN: -21 mV pH<sup>-1</sup>. Inset:  $E_0$  of Cyts  
666 derived from the DPV of riboflavin-bound Cyts. The slope was -47 mV pH<sup>-1</sup> which is near the  
667 reported value for MtrC, a subunit of Cyts (56).

668

669 **Fig. 3.** EET capabilities of *S. oneidensis* MR-1 with each N5 molecule as a function of the  $E_0$   
670 of each cofactor (A) and  $pK_a(N5)$  in one-electron reduced form (B). The  $E_0$  for all cofactors  
671 bound to Cyts except FMN and riboflavin were determined by differential pulse voltammetry  
672 (DPV) (Figs. S3 and S4). The  $E_0$  for FMN and riboflavin were obtained from the literature  
673 (15, 20). The  $pK_a(N5)$  were calculated using a quantum chemical approach (Figs. S10 and  
674 S11).  $pK_a(N5)$  of FMN and riboflavin were obtained from the literature (19). Error bars  
675 represent the mean  $\pm$  SEM for  $\geq$ three individual experiments. The gray dotted line shows the  
676 suppression of the EET capability of DMMB relative to MB. The dashed line is for visual  
677 guidance and orientation.

678

679 **Fig. 4.** Effect of deuterium ion on EET kinetics in the presence of redox molecules.  
680 Representative time course for current production in the *S. oneidensis* MR-1 monolayer  
681 biofilm in the presence of 2.0  $\mu\text{M}$  TN (A) and MB (B). The arrows indicate the time points of  
682  $\text{D}_2\text{O}$  (solid line) or  $\text{H}_2\text{O}$  (dotted line) addition. Data corresponding to the dotted line were  
683 normalized to the data point immediately before  $\text{D}_2\text{O}$  addition in the solid line data. (C) Effect  
684 of  $\text{D}_2\text{O}$  addition at subtoxic concentrations ( $\leq 4\%$  v/v) on  $i_c$  in the presence of 2.0  $\mu\text{M}$  MB  
685 (circle plots) or TN (triangle plots). Data for 2.0  $\mu\text{M}$  riboflavin (square plots) were obtained  
686 from the literature (47) for comparison. Error bars represent the mean  $\pm$  SEM for  $\geq$ three  
687 experiments in separate reactors. (D) Kinetic isotope effect (KIE) on the EET per unit  
688 concentration of the cofactor-bound Cyts complexes in 4% (v/v)  $\text{D}_2\text{O}$ . Error bars represent  
689 mean  $\pm$  SEM for  $\geq$ three experiments in separate reactors. Gray dashed line represents the KIE  
690 on EET for 4% (v/v)  $\text{D}_2\text{O}$  in the presence of 100  $\mu\text{M}$   $\alpha$ -AQS reported in ref. (47). Numeric  
691 data are indicated above each plot.

692

693 **Fig. 5.** Baseline subtracted differential pulse (DP) voltammograms of the *S. oneidensis* MR-1  
694 monolayer biofilm in the presence of 2.0  $\mu\text{M}$  riboflavin (A), TN (B), and MB (C). (i) and (ii)  
695 represent the data before and after the addition of 4% (v/v) deuterium oxide, respectively.  
696 Black and gray lines are baseline subtracted DP voltammograms and fitted lines, respectively.  
697 A fitted line composed of two peaks is represented by red and blue lines. According to (15,  
698 20), the blue peak is assigned to the Cyts and the red peak is assigned to a bound cofactor.  
699 The oxidative peaks in panel (C) were not able to be deconvoluted by SOAS because they  
700 overlapped.

701

702 **Fig. 6.** Schematic representation of the molecular control of respiratory electron outflow in *S.*  
703 *oneidensis* MR-1 mediated by flavin, flavin analogs, and quinones.
